# Supplementary material for: Group 4 metal complexes with new chiral pincer NHC-ligands: synthesis, structure and catalytic activity
Source: Royal Society of Chemistry journal article supplement (doi:10.1039/c4dt00510d), 2014-01-01
Supplement: c4dt00510d1.pdf [file c4dt00510d1.pdf]

*Supporting Information for*

**Group 4 metal complexes with new chiral pincer NHC-ligands: Synthesis,  
structure and catalytic activity**

Ning Zhao, Guohua Hou, Xuebin Deng, Guofu Zi\* and Marc D. Walter\*

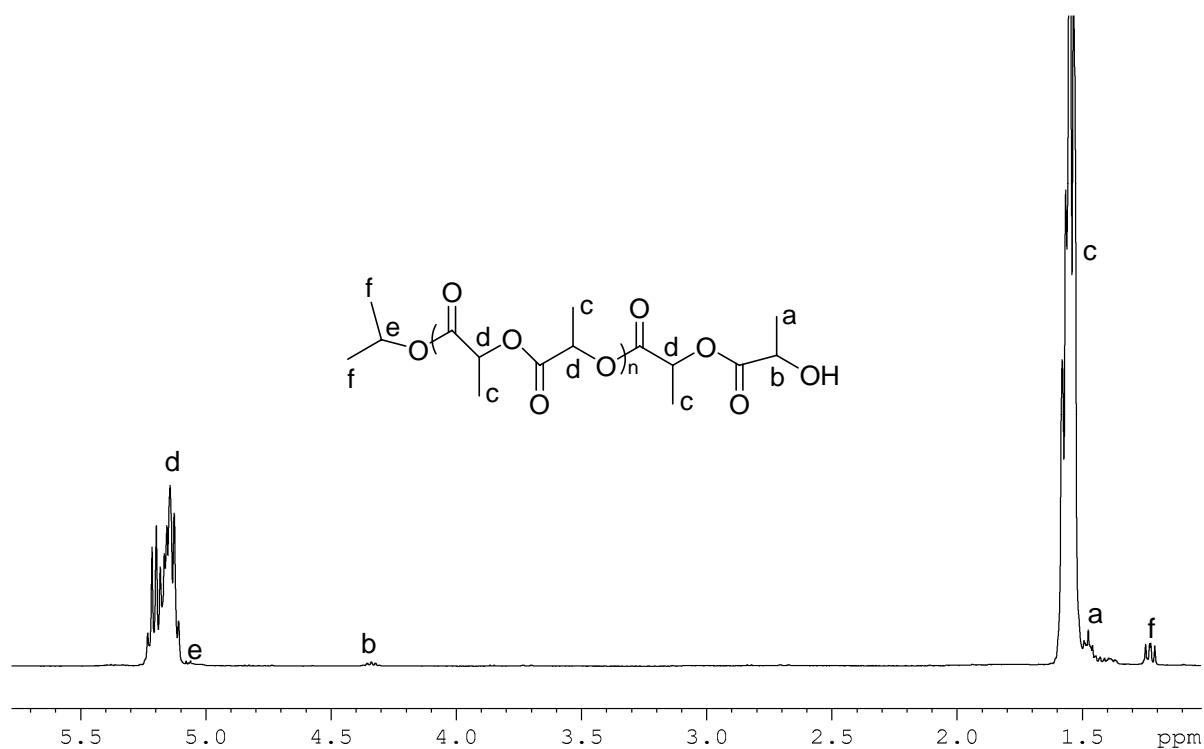

**Figure S1.** <sup>1</sup>H NMR spectrum (500 MHz, CDCl<sub>3</sub>) of a polymer sample obtained from the **8**/isopropanol system with **8**/isopropanol/LA (mol/mol/mol) = 1/1/100 (Table 4, entry 3).

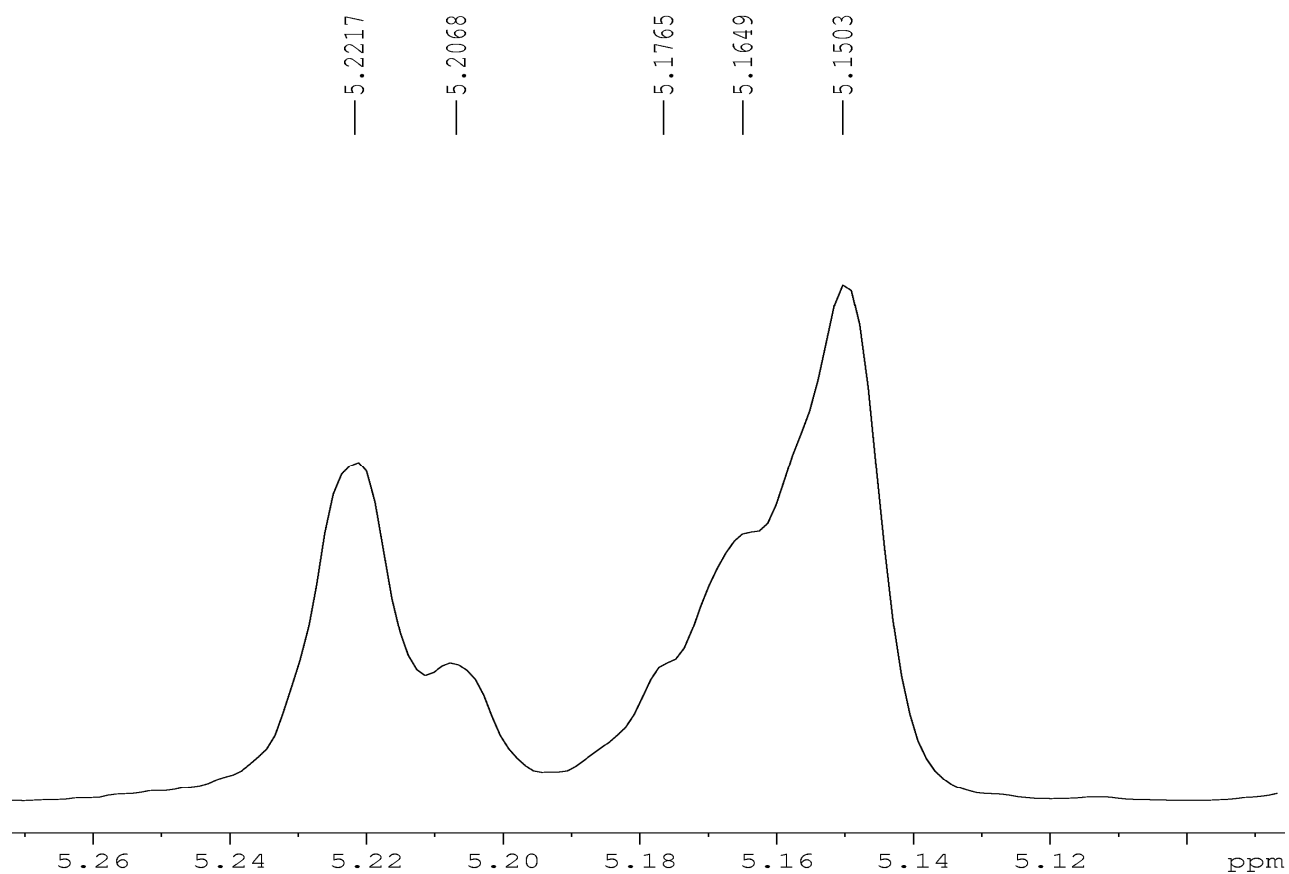

**Figure S2.** Decoupled  $^1\text{H}$  NMR spectrum (500 MHz,  $\text{CDCl}_3$ ) of a polymer sample obtained from the **8**/isopropanol system with **8**/isopropanol/LA (mol/mol/mol) = 1/1/100 (Table 4, entry 3).
